1  
2  
3  
4  
5  
6  
7  
8  
9  
10  
11  
12  
13  
14  
15  
16  
17  
18  
19  
20  
21  
22  
23  
24  
25

## Current situation of the hospitalization of persons without family in Japan and related medical challenges

**Short title:** Medical challenges and hospitalization of persons without family

Sayaka Yamazaki<sup>1\*</sup>, Nanako Tamiya<sup>2</sup>, Kaori Muto<sup>3</sup>, Yuki Hashimoto<sup>4</sup>, Zentaro Yamagata<sup>5</sup>

<sup>1</sup>School of Nursing, Health Science University, Tsuru, Yamanashi 402-8580, Japan

<sup>2</sup>Department of Health Services Research, Faculty of Medicine, University of Tsukuba, Tsukuba, Ibaraki 305-8575, Japan

<sup>3</sup>Department of Public Policy, Institute of Medical Science, The University of Tokyo, Minato-ku, Tokyo 108-8639, Japan

<sup>4</sup>School of Law, Waseda University, Shinjuku-ku, Tokyo 169-8050, Japan

<sup>5</sup>Department of Health Sciences, Basic Science for Clinical Medicine, Division of Medicine, Graduate School Department of Interdisciplinary Research, University of Yamanashi, Chuo, Yamanashi 409-3898, Japan

\*Corresponding author:

Email: [s.yamazaki@kenkoudai.ac.jp](mailto:s.yamazaki@kenkoudai.ac.jp) (SY)

NOTE: This preprint reports new research that has not been certified by peer review and should not be used to guide clinical practice.

## 26 **Abstract**

27           This study aims to determine the approximate number of hospitalizations of persons  
28 without family and the medical challenges they encounter in hospitals across Japan. Self-  
29 administered questionnaires were mailed to 4,000 randomly selected hospitals nationwide to  
30 investigate the actual conditions and problems, decision-making processes, and use of the  
31 government-recommended Guidelines for the hospitalization of, and decision-making support  
32 for, persons without family. To identify the characteristics of each region and hospital  
33 function, chi-square tests were used to make separate group comparisons by hospital location  
34 and type. Responses were received from 1,271 hospitals (31.2% response rate), of which 952  
35 hospitals provided information regarding the number of admissions of persons without  
36 family. The mean (SD) and median number of hospitalizations (approximate number per  
37 year) of patients without family was 16 (79) and 5, respectively. Approximately 70% of the  
38 target hospitals had allowed the hospitalization of a person without family. The most  
39 common difficulties encountered during the hospitalization were collecting emergency  
40 contact information, decision-making related to medical care, and discharge support. In the  
41 absence of family members and surrogates, the medical team undertook the decision-making  
42 process, which was commonly performed according to manuals and guidelines and by  
43 consulting an ethics committee. Regarding the use of the government-recommended  
44 Guidelines, approximately 70% of the hospitals that were aware of these Guidelines  
45 responded that they had never taken any action based on these Guidelines, with significant  
46 differences by region and hospital type. To solve the problems related to the hospitalization  
47 of persons without family, the public should be made aware of these Guidelines, and  
48 measures should be undertaken to make clinical ethics consultation a sustainable activity  
49 within hospitals.

50

51 **Keywords:** persons without family; unrepresented patients; adult orphans; medical decision-  
52 making; medical challenges; medical care; government-recommended guidelines

53

## 54 **Introduction**

55 Adults without family members or other surrogate decision makers are known as  
56 "unrepresented patients" or "adult orphans," while older adults without family members or  
57 other surrogate decision makers are called "elder orphans" [1,2]. The term "unbefriended"  
58 was more commonly used than the other terms to describe these persons in the bioethics,  
59 medical, and legal literature [3]. In 2009, a study on the current situation of elder orphans [4]  
60 and the impact of the growing number of adult orphans on healthcare providers [5] was  
61 conducted. Thereafter, as an emerging topic, research on persons without family has been  
62 increasing, mainly in the United States. In particular, many studies have focused on related  
63 ethical issues [1,6,7-11] and approaches [11-17] to the challenges facing healthcare [7,8].  
64 While some research in recent years has examined clinical issues [18,19], studies addressing  
65 this problem are limited, and most have been conducted in the United States and other  
66 Western countries. The number of extant empirical studies is extremely limited [20].

67 In the United States, 22.6% of the population is at a high risk of becoming  
68 "unbefriended" [2]. In fact, most clinicians encounter an unbefriended individual at least once  
69 a quarter [21], and the unbefriended status accounts for 16% of intensive care unit patients  
70 [22] and 3% of nursing home residents [23]. In the U.S., adults without surrogates are  
71 characterized as white, male, 65 years or older, and as having a family member, but not  
72 having a proxy, because they are not cooperative in decision-making [24]. Adults without  
73 surrogates experience longer hospital stays and delays in receiving palliative care and  
74 treatment [25]. Further, one study in a Canadian long-term care facility found that social  
75 support for these individuals was limited, and even basic personal items were difficult to

76 obtain [18]. In 2016, the American Geriatrics Society recommended creating and adapting  
77 uniform and legal decision-making standards for unbefriended populations nationwide [13];  
78 however, professional guidelines and laws for addressing issues related to this population  
79 have been inconsistent [26].

80         During admission, approximately 60% of hospitals in Japan require a guarantor, who  
81 plays a variety of roles related to the patient's admission, such as payment of hospitalization  
82 expenses, guaranteeing debts, preparing necessary items for hospitalization, and postmortem  
83 affairs [27]. A guarantor is not an adult guardian, as stipulated by law, but primarily a  
84 patient's family member who serves as a guarantor without compensation and participates in  
85 the patient's medical decisions, regardless of the degree of decision-making by the patient.  
86 However, the increase in the number of single-person households has made the operation of  
87 this practice more difficult [27]. In fact, in recent years, persons without dependable family  
88 members have been reportedly denied hospitalization in Japan [27,28]. Against this  
89 background, the "Guidelines for the Hospitalization of Persons without Family and Support  
90 for Persons with Difficulty in Decision-Making Regarding Medical Care" [29] (hereinafter  
91 referred to as the "Guidelines") were issued in 2019. The Guidelines were compiled by a  
92 research group, and The Ministry of Health, Labor, and Welfare recommends following  
93 them. However, no studies have quantitatively investigated the hospitalization and medical  
94 challenges of persons without family members in Japan.

95         The aim of this study was to determine the approximate number of hospitalizations of  
96 persons without family in Japan and the hospitalization and medical challenges they face.  
97 Based on prior research [27,28], we hypothesized that support for persons without family  
98 would vary according to region and hospital size and function, and we aimed to test this  
99 hypothesis.

100

## 101 **Materials and methods**

102 Self-administered hard copy questionnaires (S1 Questionnaire) were mailed to 4,000  
103 hospitals, selected randomly from 7,244 hospitals nationwide that had reported on the  
104 function of hospital beds [30] in the 2009 fiscal year. The questionnaires were distributed to  
105 nursing managers or medical social workers; we hoped that this group would have the  
106 awareness of, and experience with, persons without family. The survey was conducted from  
107 September to November 2020.

108 The questionnaire included questions on the number of hospitalizations of persons  
109 without family (approximate number per year), difficulties arising in the hospitalization of  
110 these individuals, decision-making processes for medical care when a person's wishes cannot  
111 be confirmed at the point when a decision regarding medical care for a person without family  
112 is required, and the use of the Guidelines. According to the Guidelines, "persons without  
113 family" include "persons who are unable to contact their families" and "persons who are  
114 unable to obtain support from their families"; thus, based on these Guidelines, this study also  
115 classified those who are unable to obtain support from their families as "persons without  
116 family."

117 Based on previous research [27,28], we organized the roles that family members  
118 perform on behalf of patients who are hospitalized. Further, we created eight difficult  
119 situations that persons without family may encounter, such as the collection of emergency  
120 contact information; matters related to hospitalization plans, supplies needed during  
121 hospitalization, hospitalization expenses, discharge support and the retrieval of bodies and  
122 belongings and funeral services; as well as decision-making related to medical care and  
123 "other," which was a free-text option. Following previous research [11,12,26] on the  
124 decision-making process regarding the medical care for persons with no family, and who  
125 experience difficulty in making decisions, nine representative processes were created to

126 represent the medical care decision-making process for such individuals. These entailed  
127 decisions made according to manuals and guidelines, by medical care teams, at conferences,  
128 by the ethics committee, by the attending physician, by patient's acquaintances and friends,  
129 and “other,” which was a free-text option. The questionnaire was reviewed and developed by  
130 experts in public health, law, ethics, and nursing.

131 To clarify the differences and characteristics by region and hospital type, we  
132 conducted a survey of hospital locations (Local, Tokyo, Osaka, and Nagoya) and hospital  
133 types (general hospitals, hospitals with beds for long-term care, special functioning hospitals,  
134 and regional medical care support hospitals). The groups were compared using a chi-square  
135 test. If the expected value was less than or equal to 5, Fisher's exact test was performed. We  
136 used the locations defined by the Ministry of Land, Infrastructure, Transport, and Tourism  
137 [31,32], with Tokyo, Kanagawa, Saitama, Chiba, and Ibaraki prefectures being classified as  
138 the Tokyo area; Kyoto, Osaka, Hyogo, and Nara prefectures as the Osaka area; Aichi and Mie  
139 prefectures as the Nagoya area; and other prefectures as local areas. Since special functioning  
140 hospitals are required to have at least 400 beds, and regional medical care support hospitals  
141 are required to have at least 200 beds, group comparisons by hospital type were stratified by  
142 the number of beds to adjust for confounding by this number. All analyses were performed  
143 using Stata17.

144 The study was approved by the Ethics Committee of the University of Yamanashi,  
145 School of Medicine (Reception No. 2281, July 17, 2020). Survey responses were anonymous,  
146 and no identifying patient information was collected.

147

## 148 **Results**

149 The questionnaire response rate was 31.8% (1,271 collected questionnaires). The  
150 respondents comprised 910 (71.6%) medical social workers and 382 (30.1%) nurses.

151 Respondents were allowed to answer by selecting more than one option to describe their job  
152 role (e.g., some respondents were both nurses and medical social workers). Cross tables for  
153 region and hospital type (S2 Table), hospital type and number of beds (S3 Table), and  
154 number of beds and region (S4 Table) are shown in Supporting Information.

155

## 156 **Characteristics of hospitals that responded to the survey**

157 Table 1 shows the characteristics of the hospitals that responded to the survey. The  
158 highest percentage of respondents (72.9%) cited "emergency contact information" as a  
159 difficult situation during hospitalization for persons without family, followed by "decision-  
160 making related to medical care" at 66.6%. The most commonly cited decision-making  
161 process for medical care, when the wishes of persons without family cannot be confirmed at  
162 the point when a decision regarding their medical care is required, was "decisions made by  
163 the medical care team," at 45.0%. Regarding the use of the Guidelines, the highest percentage  
164 (46.6%) of respondents answered, "We have never taken Guideline-based action," followed  
165 by 29.9% who selected, "We do not know about the Guidelines" (Table 1).

166

167 **Table 1. Characteristics of hospitals that responded to the survey N=1271**

|               | <b>n</b> | <b>%<sup>a</sup></b> |
|---------------|----------|----------------------|
| <b>Region</b> |          |                      |
| Local Area    | 797      | 62.7                 |
| Tokyo area    | 245      | 19.3                 |
| Osaka area    | 162      | 12.7                 |
| Nagoya area   | 53       | 4.2                  |
| Missing value | 14       | 1.1                  |

| <b>Hospital Type</b>                                                                                                          |     |      |
|-------------------------------------------------------------------------------------------------------------------------------|-----|------|
| Hospitals with long-term care beds                                                                                            | 612 | 48.2 |
| General hospitals <sup>b</sup>                                                                                                | 522 | 41.1 |
| Regional medical care support hospitals                                                                                       | 84  | 6.6  |
| Special functioning hospitals                                                                                                 | 24  | 1.9  |
| Missing value                                                                                                                 | 29  | 2.3  |
| <b>Establishing entity</b>                                                                                                    |     |      |
| Private corporation or individual                                                                                             | 934 | 73.5 |
| Public organization                                                                                                           | 264 | 20.8 |
| National                                                                                                                      | 63  | 5.0  |
| Missing value                                                                                                                 | 10  | 0.8  |
| <b>Number of beds</b>                                                                                                         |     |      |
| 20–49                                                                                                                         | 114 | 9.0  |
| 50–99                                                                                                                         | 299 | 23.5 |
| 100–199                                                                                                                       | 463 | 36.4 |
| 200–399                                                                                                                       | 250 | 19.7 |
| 400+                                                                                                                          | 134 | 10.5 |
| Missing value                                                                                                                 | 11  | 0.9  |
| <b>Situations that were difficult to deal with during the hospitalization of a person without family (multiple responses)</b> |     |      |
| Emergency contact information                                                                                                 | 927 | 72.9 |
| Decision-making related to medical care                                                                                       | 846 | 66.6 |
| Matters related to discharge support                                                                                          | 783 | 61.6 |
| Matters related to hospitalization expenses                                                                                   | 755 | 59.4 |
| Matters related to supplies needed during hospitalization                                                                     | 708 | 55.7 |



|                                                                                  |     |      |
|----------------------------------------------------------------------------------|-----|------|
| Matters related to the retrieval of the body and belongings and funeral services | 703 | 55.3 |
| Matters related to hospitalization plans                                         | 336 | 26.4 |

---

**Decision-making process for medical care for persons without family**

**(multiple responses)**

|                                                       |     |      |
|-------------------------------------------------------|-----|------|
| Decisions made by the medical care team               | 572 | 45.0 |
| Decisions made at conferences                         | 531 | 41.8 |
| Decisions made by the attending physician             | 523 | 41.1 |
| Decisions made according to manuals and guidelines    | 381 | 30.0 |
| Decisions made by patient's acquaintances and friends | 248 | 19.5 |
| Decisions made by the ethics committee                | 224 | 17.6 |
| Medical social worker decides                         | 70  | 5.5  |
| The charge nurse makes the decision.                  | 26  | 2.0  |

---

**Use of the Guidelines<sup>c</sup>**

|                                                        |     |      |
|--------------------------------------------------------|-----|------|
| We have never responded according to the Guidelines    | 592 | 46.6 |
| We do not know about the Guidelines                    | 380 | 29.9 |
| We have taken action in accordance with the Guidelines | 268 | 21.1 |
| Missing value                                          | 31  | 2.4  |

168 <sup>a</sup> Percentage divided by total number

169 <sup>b</sup> Hospitals without beds for long-term care

170 <sup>c</sup> Guidelines for hospitalization of persons without family and support for persons with  
171 decision-making difficulties

172

173 Regarding the number of hospitalizations of persons without family (approximate

174 number per year), the average value was used as the approximate number per year, for

175 responses that included a range (e.g., "1 to 3"). Consequently, respondents from 952 hospitals  
 176 stated that there were at least 0.5 hospitalizations of persons without family per year, with a  
 177 minimum value of 0.5 and a maximum value of 2,000. The mean (SD) was 16 (79), and the  
 178 median was 5. The Nagoya area had the highest mean value of 43 (176), compared with the  
 179 other regions. Special functioning hospitals also had a higher mean value of 27 (28)  
 180 compared with other types of hospitals. Further, as the number of beds increased, the number  
 181 of admissions of persons without family increased (p for trend <0.001) (Table 2).

182

183 **Table 2. Number of hospitalizations of persons without family (approximate number**  
 184 **per year) N=952**

|                                       | n   | Min | Max  | Mean (SD) | Median | Percentiles |     |    | P*     |
|---------------------------------------|-----|-----|------|-----------|--------|-------------|-----|----|--------|
|                                       |     |     |      |           |        | 25          | 50  | 75 |        |
| Total                                 | 952 | 0.5 | 2000 | 16 (79)   | 5      | 2           | 5   | 12 |        |
| Region <sup>a</sup>                   |     |     |      |           |        |             |     |    |        |
| Local area                            | 604 | 0.5 | 120  | 9(12)     | 5      | 2           | 5   | 10 | <0.001 |
| Tokyo area                            | 171 | 1   | 500  | 24(51)    | 10     | 5           | 10  | 20 |        |
| Osaka area                            | 132 | 3   | 2000 | 32(176)   | 7      | 3           | 7   | 20 |        |
| Nagoya area                           | 38  | 1   | 1081 | 43(176)   | 5.5    | 2           | 5.5 | 15 |        |
| Missing value                         | 7   | -   | -    | -         | -      | -           | -   | -  |        |
| Hospital type <sup>a</sup>            |     |     |      |           |        |             |     |    |        |
| General hospitals                     | 383 | 1   | 1081 | 15(57)    | 5.5    | 2           | 5.5 | 15 | <0.001 |
| Hospitals with<br>long-term care beds | 463 | 0.5 | 2000 | 16(99)    | 4      | 2           | 4   | 10 |        |
| Special functioning<br>hospitals      | 14  | 10  | 118  | 27(28)    | 19     | 12          | 19  | 50 |        |

|                                         |     |     |      |         |    |      |    |    |        |
|-----------------------------------------|-----|-----|------|---------|----|------|----|----|--------|
| Regional medical care support hospitals | 72  | 1   | 200  | 26(34)  | 15 | 9    | 15 | 30 |        |
| Missing value                           | 20  | -   | -    | -       | -  | -    | -  | -  |        |
| Number of beds <sup>b</sup>             |     |     |      |         |    |      |    |    |        |
| 20–49                                   | 79  | 1   | 38   | 6(8)    | 2  | 1.0  | 2  | 6  | <0.001 |
| 50–99                                   | 217 | 1   | 360  | 9(28)   | 3  | 2.0  | 3  | 8  |        |
| 100–199                                 | 368 | 0.5 | 500  | 12(30)  | 5  | 2.5  | 5  | 10 |        |
| 200–399                                 | 189 | 1   | 2000 | 25(146) | 8  | 4.0  | 8  | 17 |        |
| 400+                                    | 93  | 1   | 1081 | 41(117) | 15 | 10.0 | 15 | 30 |        |
| Missing value                           | 6   | -   | -    | -       | -  | -    | -  | -  |        |

185 <sup>a</sup>Number of individual hospitalizations, excluding missing values, compared between groups  
 186 by Kruskal–Wallis test.

187 <sup>b</sup>Number of individual hospitalizations, excluding missing values, compared between groups  
 188 by Jonckheere–Terpstra test.

189 \*p < .05

190

## 191 **Between-group comparison of difficult situations to deal with in** 192 **the hospitalization of persons without family**

193 Tables 3 and 4 list the difficult situations encountered during the hospitalization of  
 194 persons without family. In terms of percentage by region, a higher percentage of respondents  
 195 from hospitals in the Tokyo, Osaka, and Nagoya regions selected "matters related to  
 196 hospitalization expenses" as a difficult situation to deal with, compared to respondents from  
 197 local regions (Table 3).

198

199 **Table 3. Difficult situations during the hospitalization of persons without family**  
200 **(multiple responses) by region n=1257<sup>a</sup>**

|                                                           |        | Local area | Tokyo area | Osaka area | Nagoya area | <i>P</i> * |
|-----------------------------------------------------------|--------|------------|------------|------------|-------------|------------|
| Emergency contact information                             | Yes(%) | 579 (72.6) | 180 (73.5) | 114 (70.4) | 43 (81.1)   | 0.492      |
|                                                           | No(%)  | 218 (27.4) | 65 (26.5)  | 48 (29.6)  | 10 (18.9)   |            |
| Matters related to hospitalization plan                   | Yes(%) | 231 (29.0) | 49 (20.0)  | 40 (24.7)  | 13 (24.5)   | 0.042      |
|                                                           | No(%)  | 566 (71.0) | 196 (80.0) | 122 (75.3) | 40 (75.5)   |            |
| Matters related to supplies needed during hospitalization | Yes(%) | 459 (57.6) | 127 (52.8) | 80 (49.4)  | 33 (62.3)   | 0.103      |
|                                                           | No(%)  | 338 (42.4) | 118 (48.2) | 82 (50.6)  | 20 (37.7)   |            |
| Matters related to hospitalization expenses               | Yes(%) | 445 (55.8) | 161 (65.7) | 106 (65.4) | 34 (64.1)   | 0.011      |
|                                                           | No(%)  | 352 (44.2) | 84 (34.3)  | 56 (34.6)  | 19 (35.9)   |            |
| Matters related to discharge support                      | Yes(%) | 487 (61.1) | 150 (61.2) | 105 (64.8) | 32 (60.4)   | 0.840      |
|                                                           | No(%)  | 310 (38.9) | 95 (38.8)  | 57 (35.2)  | 21 (39.6)   |            |
| Matters related to the retrieval of bodies and            | Yes(%) | 440 (55.2) | 128 (52.2) | 100 (61.7) | 27 (50.9)   | 0.257      |
|                                                           | No(%)  | 357 (44.7) | 117 (47.8) | 62 (38.2)  | 26 (49.1)   |            |

belongings and

funeral services

|                 |        |            |            |            |           |       |
|-----------------|--------|------------|------------|------------|-----------|-------|
| Decision-making | Yes(%) | 531 (66.6) | 161 (65.7) | 106 (65.4) | 37 (69.8) | 0.947 |
|-----------------|--------|------------|------------|------------|-----------|-------|

|            |       |            |           |           |           |  |
|------------|-------|------------|-----------|-----------|-----------|--|
| related to | No(%) | 266 (33.4) | 84 (34.3) | 56 (34.6) | 16 (30.2) |  |
|------------|-------|------------|-----------|-----------|-----------|--|

medical care

201 <sup>a</sup> Number of persons (in %), excluding missing values, compared between groups by chi-  
 202 square test. When the expected frequency of 5 or less was included, Fisher's exact test was  
 203 used.

204 \*p < .05

205

206 **Table 4. Difficult situations during the hospitalization of persons without family**

207 **(multiple responses) by hospital type and number of beds n=1242 <sup>a</sup>**

|                    |        | 20–49     |            |             |           | P*    |
|--------------------|--------|-----------|------------|-------------|-----------|-------|
|                    |        | n=110     |            |             |           |       |
|                    |        | General   | Hospitals  | Special     | Regional  |       |
|                    |        | hospitals | with long- | functioning | medical   |       |
|                    |        |           | term care  | hospitals   | care      |       |
|                    |        |           | beds       |             | support   |       |
|                    |        |           |            |             | hospitals |       |
| Emergency contact  | Yes(%) | 47 (61.8) | 16 (47.1)  | -           | -         | 0.147 |
| information        | No(%)  | 28 (38.2) | 18 (52.9)  | -           | -         |       |
| Matters related to | Yes(%) | 18 (23.7) | 7 (20.6)   | -           | -         | 0.720 |
| hospitalization    | No(%)  | 58 (76.3) | 27 (79.4)  | -           | -         |       |
| plan               |        |           |            |             |           |       |
| Matters related to | Yes(%) | 35 (46.1) | 19 (55.9)  | -           | -         | 0.341 |

|                    |        |           |            |             |           |            |
|--------------------|--------|-----------|------------|-------------|-----------|------------|
| supplies needed    | No(%)  | 41 (53.9) | 15 (44.1)  | -           | -         |            |
| during             |        |           |            |             |           |            |
| hospitalization    |        |           |            |             |           |            |
| Matters related to | Yes(%) | 30 (39.5) | 15 (44.1)  | -           | -         | 0.647      |
| hospitalization    | No(%)  | 46 (60.5) | 19 (55.9)  | -           | -         |            |
| expenses           |        |           |            |             |           |            |
| Matters related to | Yes(%) | 36 (47.4) | 10 (29.4)  | -           | -         | 0.078      |
| discharge support  | No(%)  | 40 (52.6) | 24 (70.6)  | -           | -         |            |
| Matters related to | Yes(%) | 31 (40.8) | 12 (35.3)  | -           | -         | 0.058      |
| the retrieval of   | No(%)  | 45 (59.2) | 22 (64.7)  | -           | -         |            |
| bodies and         |        |           |            |             |           |            |
| belongings and     |        |           |            |             |           |            |
| funeral services   |        |           |            |             |           |            |
| Decision-making    | Yes(%) | 39 (51.3) | 15 (44.1)  | -           | -         | 0.485      |
| related to medical | No(%)  | 37 (48.7) | 19 (55.9)  | -           | -         |            |
| care               |        |           |            |             |           |            |
|                    |        |           |            | 50–99       |           | <i>P</i> * |
|                    |        |           |            | n=296       |           |            |
|                    |        | General   | Hospitals  | Special     | Regional  |            |
|                    |        | hospitals | with long- | functioning | medical   |            |
|                    |        |           | term care  | hospitals   | care      |            |
|                    |        |           | beds       |             | support   |            |
|                    |        |           |            |             | hospitals |            |
| Emergency contact  | Yes(%) | 94 (68.1) | 100 (63.3) | -           | -         | 0.384      |
| information        | No(%)  | 44 (31.9) | 58 (36.7)  | -           | -         |            |

|                                                                                |        |                   |                      |                               |                       |            |
|--------------------------------------------------------------------------------|--------|-------------------|----------------------|-------------------------------|-----------------------|------------|
| Matters related to hospitalization plan                                        | Yes(%) | 33 (23.9)         | 31 (19.6)            | -                             | -                     | 0.371      |
|                                                                                | No(%)  | 105 (76.1)        | 127 (80.4)           | -                             | -                     |            |
| Matters related to supplies needed during hospitalization                      | Yes(%) | 69 (50.0)         | 74 (46.8)            | -                             | -                     | 0.587      |
|                                                                                | No(%)  | 69 (50.0)         | 84 (53.2)            | -                             | -                     |            |
| Matters related to hospitalization expenses                                    | Yes(%) | 67 (48.6)         | 69 (43.7)            | -                             | -                     | 0.401      |
|                                                                                | No(%)  | 71 (51.4)         | 89 (56.3)            | -                             | -                     |            |
| Matters related to discharge support                                           | Yes(%) | 78 (56.5)         | 71 (44.9)            | -                             | -                     | 0.047      |
|                                                                                | No(%)  | 60 (43.5)         | 87 (55.1)            | -                             | -                     |            |
| Matters related to the retrieval of bodies and belongings and funeral services | Yes(%) | 56 (40.6)         | 77 (48.7)            | -                             | -                     | 0.159      |
|                                                                                | No(%)  | 82 (59.4)         | 81 (51.3)            | -                             | -                     |            |
| Decision-making related to medical care                                        | Yes(%) | 85 (61.6)         | 86 (54.4)            | -                             | -                     | 0.213      |
|                                                                                | No(%)  | 53 (38.4)         | 72 (45.6)            | -                             | -                     |            |
|                                                                                |        | 100–199           |                      |                               |                       | <i>P</i> * |
|                                                                                |        | n=455             |                      |                               |                       |            |
|                                                                                |        | General hospitals | Hospitals with long- | Special functioning hospitals | Regional medical care |            |

|                    |        |            | term care  |   | support   |       |
|--------------------|--------|------------|------------|---|-----------|-------|
|                    |        |            | beds       |   | hospitals |       |
| Emergency contact  | Yes(%) | 122 (75.8) | 218 (74.1) | - | -         | 0.703 |
| information        | No(%)  | 39 (24.2)  | 76 (25.9)  | - | -         |       |
| Matters related to | Yes(%) | 43 (26.7)  | 82 (27.9)  | - | -         | 0.787 |
| hospitalization    | No(%)  | 118 (73.3) | 212 (72.1) | - | -         |       |
| plan               |        |            |            |   |           |       |
| Matters related to | Yes(%) | 93 (57.8)  | 146 (49.7) | - | -         | 0.098 |
| supplies needed    | No(%)  | 68 (42.2)  | 148 (50.3) | - | -         |       |
| during             |        |            |            |   |           |       |
| hospitalization    |        |            |            |   |           |       |
| Matters related to | Yes(%) | 111 (68.9) | 179 (60.9) | - | -         | 0.087 |
| hospitalization    | No(%)  | 50 (31.1)  | 115 (39.1) | - | -         |       |
| expenses           |        |            |            |   |           |       |
| Matters related to | Yes(%) | 115 (71.4) | 164 (55.8) | - | -         | 0.001 |
| discharge support  | No(%)  | 46 (28.6)  | 130 (44.2) | - | -         |       |
| Matters related to | Yes(%) | 101 (62.7) | 159 (54.1) | - | -         | 0.075 |
| the retrieval of   | No(%)  | 30 (37.3)  | 135 (45.9) | - | -         |       |
| bodies and         |        |            |            |   |           |       |
| belongings and     |        |            |            |   |           |       |
| funeral services   |        |            |            |   |           |       |
| Decision-making    | Yes(%) | 106 (65.8) | 190 (64.6) | - | -         | 0.795 |
| related to medical | No(%)  | 55 (34.2)  | 104 (35.4) | - | -         |       |
| care               |        |            |            |   |           |       |



|                                                           |        | 200–399           |                                    |                               |                                         | <i>P</i> * |
|-----------------------------------------------------------|--------|-------------------|------------------------------------|-------------------------------|-----------------------------------------|------------|
|                                                           |        | n=244             |                                    |                               |                                         |            |
|                                                           |        | General hospitals | Hospitals with long-term care beds | Special functioning hospitals | Regional medical care support hospitals |            |
| Emergency contact information                             | Yes(%) | 83 (83.0)         | 77 (72.0)                          | -                             | 34 (91.9)                               | 0.019      |
|                                                           | No(%)  | 17 (17.0)         | 30 (28.0)                          | -                             | 3 (8.1)                                 |            |
| Matters related to hospitalization plan                   | Yes(%) | 28 (28.0)         | 35 (32.7)                          | -                             | 17 (46.0)                               | 0.139      |
|                                                           | No(%)  | 72 (72.0)         | 72 (67.3)                          | -                             | 20 (54.0)                               |            |
| Matters related to supplies needed during hospitalization | Yes(%) | 70 (70.0)         | 63 (58.9)                          | -                             | 29 (78.4)                               | 0.059      |
|                                                           | No(%)  | 30 (30.0)         | 44 (41.1)                          | -                             | 8 (21.6)                                |            |
| Matters related to hospitalization expenses               | Yes(%) | 68 (68.0)         | 64 (59.8)                          | -                             | 30 (81.1)                               | 0.056      |
|                                                           | No(%)  | 32 (32.0)         | 43 (40.2)                          | -                             | 7 (18.9)                                |            |
| Matters related to discharge support                      | Yes(%) | 78 (78.0)         | 67 (62.6)                          | -                             | 32 (86.5)                               | 0.006      |
|                                                           | No(%)  | 22 (22.0)         | 40 (37.4)                          | -                             | 5 (13.5)                                |            |
| Matters related to the retrieval of bodies and            | Yes(%) | 69 (69.0)         | 62 (58.0)                          | -                             | 22 (59.5)                               | 0.235      |
|                                                           | No(%)  | 31 (31.0)         | 45 (42.0)                          | -                             | 15 (40.5)                               |            |

belongings and

funeral services

Decision-making Yes(%) 85 (85.0) 75 (70.1) - 30 (81.1) 0.031

related to medical No(%) 15 (15.0) 32 (29.9) - 7 (18.9)

care

400+

*P*\*

n=133

General Hospitals Special Regional

hospitals with long- functioning medical

term care hospitals care

beds support

hospitals

Emergency contact Yes(%) 38 (86.4) 14 (77.8) 19 (79.2) 41 (87.2) 0.661

information No(%) 6 (13.6) 4 (22.2) 5 (20.8) 6 (12.8)

Matters related to Yes(%) 9 (20.5) 4 (22.2) 7 (29.2) 13 (27.7) 0.811

hospitalization No(%) 35 (79.5) 14 (77.8) 17 (70.8) 34 (72.3)

plan

Matters related to Yes(%) 32 (72.7) 7 (38.9) 20 (83.3) 34 (72.4) 0.014

supplies needed No(%) 12 (27.3) 11 (61.1) 4 (16.7) 13 (27.6)

during

hospitalization

Matters related to Yes(%) 34 (77.3) 15 (83.3) 19 (79.2) 38 (80.8) 0.959

hospitalization No(%) 10 (22.7) 3 (16.7) 5 (20.8) 9 (19.2)

expenses

Matters related to Yes(%) 37 (84.1) 8 (44.4) 23 (95.8) 44 (93.6) <0.001

|                    |        |           |           |           |           |       |
|--------------------|--------|-----------|-----------|-----------|-----------|-------|
| discharge support  | No(%)  | 7 (15.9)  | 10 (55.6) | 1 (4.2)   | 3 (6.4)   |       |
| Matters related to | Yes(%) | 31 (70.5) | 12 (66.7) | 21 (87.5) | 34 (72.3) | 0.355 |
| the retrieval of   | No(%)  | 13 (29.5) | 6 (33.3)  | 3 (12.5)  | 13 (27.7) |       |
| bodies and         |        |           |           |           |           |       |
| belongings and     |        |           |           |           |           |       |
| funeral services   |        |           |           |           |           |       |
| Decision-making    | Yes(%) | 39 (88.6) | 12 (66.7) | 21 (97.5) | 40 (85.1) | 0.217 |
| related to medical | No(%)  | 5 (11.4)  | 6 (33.3)  | 3 (12.5)  | 7 (14.9)  |       |
| care               |        |           |           |           |           |       |

208 <sup>a</sup> Number of persons (in %), excluding missing values, compared between groups by chi-  
 209 square test. When the expected frequency of 5 or less was included, Fisher's exact test was  
 210 used.

211 \*p < .05

212

213 The percentage of respondents that selected "matters related to discharge support"  
 214 was higher in general hospitals, among the hospitals with 50–199 beds and regional medical  
 215 care support hospitals, among the hospitals with 200–399 beds. Further, special functioning  
 216 hospitals, among the hospitals with 400 or more beds, had a higher percentage of discharge  
 217 support compared with other hospitals (Table 4).

218

## 219 **Between-group comparison of decision-making processes for** 220 **medical care of persons without family**

221 Table 5 shows the decision-making processes for the medical care of persons without  
 222 family when their wishes cannot be confirmed at the point when a decision regarding their

223 medical care is required. There were no statistically significant differences in the percentages  
 224 by region.

225

226 **Table 5. Decision-making process for medical care for persons without family (multiple**  
 227 **responses) by region n=1257<sup>a</sup>**

|                                                           |        | Local area | Tokyo area | Osaka area | Nagoya area | <i>P</i> * |
|-----------------------------------------------------------|--------|------------|------------|------------|-------------|------------|
| Decisions made according to manuals and guidelines        | Yes(%) | 233 (29.2) | 73 (29.8)  | 53 (32.7)  | 17 (32.1)   | 0.825      |
|                                                           | No(%)  | 564 (70.8) | 172 (70.2) | 109 (67.3) | 36 (67.9)   |            |
| Decisions made by the medical care team                   | Yes(%) | 348 (43.6) | 111 (45.3) | 80 (49.4)  | 24 (45.3)   | 0.610      |
|                                                           | No(%)  | 449 (56.3) | 134 (54.7) | 82 (50.6)  | 29 (54.7)   |            |
| Decisions made at conferences                             | Yes(%) | 342 (42.9) | 91 (37.1)  | 67 (41.4)  | 25 (47.2)   | 0.358      |
|                                                           | No(%)  | 455 (57.1) | 154 (62.8) | 95 (58.6)  | 28 (52.8)   |            |
| Decisions made by the ethics committee                    | Yes(%) | 137 (17.2) | 34 (13.9)  | 39 (24.1)  | 10 (18.9)   | 0.066      |
|                                                           | No(%)  | 660 (82.8) | 211 (86.1) | 123 (75.9) | 43 (81.1)   |            |
| Decisions made by the attending physician                 | Yes(%) | 326 (41.0) | 114 (46.5) | 58 (35.8)  | 22 (41.5)   | 0.184      |
|                                                           | No(%)  | 471 (59.0) | 131 (53.5) | 104 (64.2) | 31 (58.5)   |            |
| Decisions made by the patient's acquaintances and friends | Yes(%) | 156 (19.6) | 52 (21.2)  | 27 (16.7)  | 11 (20.8)   | 0.719      |
|                                                           | No(%)  | 641 (80.4) | 193 (78.8) | 135 (83.3) | 42 (79.2)   |            |

228 a Number of persons (in %), excluding missing values, compared between groups by chi-  
 229 square test. When the expected frequency of 5 or less was included, Fisher's exact test was  
 230 used.

231 \*p < .05

232

233 However, regarding the percentage by hospital type, the percentage of respondents  
 234 who selected "decisions made by the attending physician" was higher in general hospitals,  
 235 among the hospitals with 50–99 beds. Compared with those in other hospitals, a higher  
 236 percentage of respondents in special functioning hospitals, among the hospitals with 400 or  
 237 more beds, selected "decisions made according to manuals and guidelines," "decisions made  
 238 by the medical care team," and "decisions made by the ethics committee"(Table 6).

239

240 **Table 6. Decision-making process for medical care for persons without family (multiple**  
 241 **responses) by hospital type and number of beds n=1242 <sup>a</sup>**

|                             |        | 20–49             |                                    |                               | <i>P</i> *                              |       |
|-----------------------------|--------|-------------------|------------------------------------|-------------------------------|-----------------------------------------|-------|
|                             |        | n=110             |                                    |                               |                                         |       |
|                             |        | General hospitals | Hospitals with long-term care beds | Special functioning hospitals | Regional medical care support hospitals |       |
| Decisions made according to | Yes(%) | 12 (15.8)         | 9 (26.5)                           | -                             | -                                       | 0.188 |
|                             | No(%)  | 64 (84.2)         | 25 (73.5)                          | -                             | -                                       |       |

|                  |           |            |             |           |   |  |            |
|------------------|-----------|------------|-------------|-----------|---|--|------------|
| manuals and      |           |            |             |           |   |  |            |
| guidelines       |           |            |             |           |   |  |            |
| Decisions made   | Yes(%)    | 17 (22.4)  | 12 (35.3)   | -         | - |  | 0.155      |
| by the medical   | No(%)     | 59 (77.6)  | 22 (64.7)   | -         | - |  |            |
| care team        |           |            |             |           |   |  |            |
| Decisions made   | Yes(%)    | 26 (34.2)  | 8 (23.5)    | -         | - |  | 0.263      |
| at conferences   | No(%)     | 50 (65.8)  | 26 (76.5)   | -         | - |  |            |
| Decisions made   | Yes(%)    | 4 (5.3)    | 1 (2.9)     | -         | - |  | 1.000      |
| by the ethics    | No(%)     | 72 (94.7)  | 33 (97.1)   | -         | - |  |            |
| committee        |           |            |             |           |   |  |            |
| Decisions made   | Yes(%)    | 41 (53.9)  | 19 (55.9)   | -         | - |  | 0.851      |
| by the attending | No(%)     | 35 (46.1)  | 15 (44.1)   | -         | - |  |            |
| physician        |           |            |             |           |   |  |            |
| Decisions made   | Yes(%)    | 20 (26.3)  | 6 (17.7)    | -         | - |  | 0.323      |
| by the patient's | No(%)     | 56 (73.7)  | 28 (82.3)   | -         | - |  |            |
| acquaintances    |           |            |             |           |   |  |            |
| and friends      |           |            |             |           |   |  |            |
|                  |           |            |             | 50–99     |   |  | <i>P</i> * |
|                  |           |            |             | n=296     |   |  |            |
|                  | General   | Hospitals  | Special     | Regional  |   |  |            |
|                  | hospitals | with long- | functioning | medical   |   |  |            |
|                  |           | term care  | hospitals   | care      |   |  |            |
|                  |           | beds       |             | support   |   |  |            |
|                  |           |            |             | hospitals |   |  |            |

|                                                           |                   |                      |                               |                       |   |            |
|-----------------------------------------------------------|-------------------|----------------------|-------------------------------|-----------------------|---|------------|
| Decisions made according to manuals and guidelines        | Yes(%)            | 29 (21.0)            | 42 (26.6)                     | -                     | - | 0.263      |
|                                                           | No(%)             | 109 (79.0)           | 116 (73.4)                    | -                     | - |            |
| Decisions made by the medical care team                   | Yes(%)            | 48 (34.8)            | 58 (36.7)                     | -                     | - | 0.730      |
|                                                           | No(%)             | 90 (65.2)            | 100 (63.3)                    | -                     | - |            |
| Decisions made at conferences                             | Yes(%)            | 49 (35.5)            | 55 (34.8)                     | -                     | - | 0.900      |
|                                                           | No(%)             | 89 (64.5)            | 103 (65.2)                    | -                     | - |            |
| Decisions made by the ethics committee                    | Yes(%)            | 11 (8.0)             | 10 (6.3)                      | -                     | - | 0.583      |
|                                                           | No(%)             | 127 (92.0)           | 148 (93.7)                    | -                     | - |            |
| Decisions made by the attending physician                 | Yes(%)            | 68 (49.3)            | 59 (37.3)                     | -                     | - | 0.039      |
|                                                           | No(%)             | 70 (50.7)            | 99 (62.7)                     | -                     | - |            |
| Decisions made by the patient's acquaintances and friends | Yes(%)            | 31 (22.5)            | 33 (20.9)                     | -                     | - | 0.742      |
|                                                           | No(%)             | 107 (77.5)           | 125 (79.1)                    | -                     | - |            |
| 100–199                                                   |                   |                      |                               |                       |   | <i>P</i> * |
| n=455                                                     |                   |                      |                               |                       |   |            |
|                                                           | General hospitals | Hospitals with long- | Special functioning hospitals | Regional medical care |   |            |

|                  |        |            | term care  |   | support   |            |
|------------------|--------|------------|------------|---|-----------|------------|
|                  |        |            | beds       |   | hospitals |            |
| Decisions made   | Yes(%) | 47 (29.2)  | 84 (28.6)  | - | -         | 0.889      |
| according to     | No(%)  | 114 (70.8) | 210 (71.4) | - | -         |            |
| manuals and      |        |            |            |   |           |            |
| guidelines       |        |            |            |   |           |            |
| Decisions made   | Yes(%) | 80 (49.7)  | 117 (39.8) | - | -         | 0.042      |
| by the medical   | No(%)  | 81 (50.3)  | 177 (60.2) | - | -         |            |
| care team        |        |            |            |   |           |            |
| Decisions made   | Yes(%) | 68 (42.2)  | 107 (36.4) | - | -         | 0.221      |
| at conferences   | No(%)  | 93 (57.8)  | 187 (63.6) | - | -         |            |
| Decisions made   | Yes(%) | 20 (12.4)  | 36 (12.2)  | - | -         | 0.956      |
| by the ethics    | No(%)  | 141 (87.6) | 258 (87.8) | - | -         |            |
| committee        |        |            |            |   |           |            |
| Decisions made   | Yes(%) | 65 (40.4)  | 114 (38.8) | - | -         | 0.739      |
| by the attending | No(%)  | 96 (59.6)  | 180 (61.2) | - | -         |            |
| physician        |        |            |            |   |           |            |
| Decisions made   | Yes(%) | 28 (17.4)  | 58 (19.7)  | - | -         | 0.543      |
| by the patient's | No(%)  | 133 (82.6) | 236 (80.3) | - | -         |            |
| acquaintances    |        |            |            |   |           |            |
| and friends      |        |            |            |   |           |            |
| 200–399          |        |            |            |   |           | <i>P</i> * |
| n=244            |        |            |            |   |           |            |



|                                                           |        | General<br>hospitals | Hospitals<br>with long-<br>term care<br>beds | Special<br>functioning<br>hospitals | Regional<br>medical<br>care<br>support<br>hospitals |       |
|-----------------------------------------------------------|--------|----------------------|----------------------------------------------|-------------------------------------|-----------------------------------------------------|-------|
| Decisions made according to manuals and guidelines        | Yes(%) | 33 (33.0)            | 38 (35.5)                                    | -                                   | 10 (27.0)                                           | 0.639 |
|                                                           | No(%)  | 67 (67.0)            | 69 (64.5)                                    | -                                   | 27 (73.0)                                           |       |
| Decisions made by the medical care team                   | Yes(%) | 63 (63.0)            | 50 (46.7)                                    | -                                   | 20 (54.1)                                           | 0.063 |
|                                                           | No(%)  | 37 (37.0)            | 57 (53.3)                                    | -                                   | 17 (45.9)                                           |       |
| Decisions made at conferences                             | Yes(%) | 61 (61.0)            | 46 (43.0)                                    | -                                   | 22 (56.5)                                           | 0.024 |
|                                                           | No(%)  | 39 (39.0)            | 61 (57.0)                                    | -                                   | 15 (40.5)                                           |       |
| Decisions made by the ethics committee                    | Yes(%) | 35 (35.0)            | 19 (17.8)                                    | -                                   | 17 (46.0)                                           | 0.001 |
|                                                           | No(%)  | 65 (65.0)            | 88 (82.2)                                    | -                                   | 20 (54.0)                                           |       |
| Decisions made by the attending physician                 | Yes(%) | 38 (38.0)            | 37 (34.6)                                    | -                                   | 19 (51.4)                                           | 0.193 |
|                                                           | No(%)  | 62 (62.0)            | 70 (65.4)                                    | -                                   | 18 (48.6)                                           |       |
| Decisions made by the patient's acquaintances and friends | Yes(%) | 20 (20.0)            | 21 (19.6)                                    | -                                   | 8 (21.6)                                            | 0.966 |
|                                                           | No(%)  | 80 (80.0)            | 86 (80.4)                                    | -                                   | 29 (78.4)                                           |       |

|                                                    |        | 400+              |                                    |                               |                                         | <i>P</i> * |
|----------------------------------------------------|--------|-------------------|------------------------------------|-------------------------------|-----------------------------------------|------------|
|                                                    |        | n=133             |                                    |                               |                                         |            |
|                                                    |        | General hospitals | Hospitals with long-term care beds | Special functioning hospitals | Regional medical care support hospitals |            |
| Decisions made according to manuals and guidelines | Yes(%) | 17 (38.6)         | 5 (27.8)                           | 17 (70.8)                     | 27 (57.5)                               | 0.012      |
|                                                    | No(%)  | 27 (61.4)         | 13 (72.2)                          | 7 (29.2)                      | 20 (42.5)                               |            |
| Decisions made by the medical care team            | Yes(%) | 24 (54.5)         | 10 (55.6)                          | 18 (75.0)                     | 42 (91.5)                               | <0.001     |
|                                                    | No(%)  | 20 (45.5)         | 8 (44.5)                           | 6 (25.0)                      | 4 (8.5)                                 |            |
| Decisions made at conferences                      | Yes(%) | 24 (54.5)         | 7 (38.9)                           | 17 (70.8)                     | 31 (66.0)                               | 0.127      |
|                                                    | No(%)  | 20 (45.5)         | 11 (61.1)                          | 7 (29.2)                      | 16 (34.0)                               |            |
| Decisions made by the ethics committee             | Yes(%) | 16 (36.4)         | 6 (33.3)                           | 15 (62.5)                     | 28 (59.6)                               | 0.038      |
|                                                    | No(%)  | 28 (63.6)         | 12 (66.7)                          | 9 (37.5)                      | 19 (40.4)                               |            |
| Decisions made by the attending physician          | Yes(%) | 20 (45.5)         | 9 (50.0)                           | 4 (16.7)                      | 16 (34.0)                               | 0.069      |
|                                                    | No(%)  | 24 (54.5)         | 9 (50.0)                           | 20 (83.4)                     | 31 (66.0)                               |            |
| Decisions made by the patient's                    | Yes(%) | 6 (13.6)          | 2 (11.1)                           | 2 (8.3)                       | 8 (17.0)                                | 0.820      |
|                                                    | No(%)  | 38 (86.4)         | 16 (88.9)                          | 22 (91.7)                     | 39 (83.0)                               |            |

acquaintances

and friends

242 <sup>a</sup> Number of persons (in %), excluding missing values, compared between groups by chi-  
243 square test. When the expected frequency of 5 or less was included, Fisher's exact test was  
244 used.

245 \* $p < .05$

246

## 247 **Between-group comparison of the use of the guidelines**

248 Table 7 demonstrates the level of the use of the Guidelines. Compared with those in  
249 the other areas, a higher percentage of respondents working in hospitals in the Osaka and  
250 Nagoya areas answered that they had taken action based on the Guidelines. Further, a higher  
251 percentage of respondents working in hospitals in local areas stated, "We have never  
252 responded according to the Guidelines," compared with respondents in the other areas.  
253 Compared with those in the other areas, a higher percentage of respondents working in  
254 hospitals in the Tokyo area responded that they did not know about the Guidelines.

255

256

257 **Table 7. Use of the Guidelines by region n=1257 <sup>a</sup>**

|                                                               | Local area | Tokyo area | Osaka area | Nagoya area | <i>P</i> * |
|---------------------------------------------------------------|------------|------------|------------|-------------|------------|
| We have taken action in<br>accordance with the<br>Guidelines. | 158 (20.4) | 48 (20.2)  | 43 (27.0)  | 15 (28.3)   | 0.028      |
| We have never responded<br>according to the Guidelines.       | 395 (50.9) | 104 (43.7) | 61 (38.4)  | 25 (47.2)   |            |

We do not know about the 223 (28.7) 86 (36.1) 55 (34.6) 13 (24.5) \_\_\_\_\_  
Guidelines.

258 <sup>a</sup> Number of persons (%), excluding missing values, compared between groups by chi-square  
259 test.

260 \*p < .05

261

262 Regarding hospital type, among the hospitals with 100–199 beds, a higher percentage  
263 of participants working at general hospitals responded, "We have taken action in accordance  
264 with the Guidelines," compared with those working at other types of hospitals. Among the  
265 hospitals with more than 400 beds, a higher percentage of respondents working in special  
266 functioning hospitals stated that they had taken action in accordance with the Guidelines,  
267 compared with those in other hospitals. A higher percentage of respondents working in  
268 hospitals with long-term care beds responded "We do not know about the Guidelines,"  
269 compared with respondents in other hospitals (Table 8).

270

271

272

273

274 **Table 8. Decision-making process for medical care for persons without family (multiple**  
275 **responses) by hospital type and number of beds n=1242 <sup>a</sup>**

|  | 20–49             |                      |                               |                       | <i>P</i> * |
|--|-------------------|----------------------|-------------------------------|-----------------------|------------|
|  | n=110             |                      |                               |                       |            |
|  | General hospitals | Hospitals with long- | Special functioning hospitals | Regional medical care |            |
|  |                   |                      |                               |                       |            |

|                                                                  |                      | term care<br>beds                            |                                     | support<br>hospitals                             |            |
|------------------------------------------------------------------|----------------------|----------------------------------------------|-------------------------------------|--------------------------------------------------|------------|
| We have taken<br>action in<br>accordance with the<br>Guidelines. | 3 (4.2)              | 1 (3.0)                                      | -                                   | -                                                | 0.111      |
| We have never<br>responded<br>according to the<br>Guidelines.    | 22 (31.0)            | 17 (51.5)                                    | -                                   | -                                                |            |
| We do not know<br>about the<br>Guidelines.                       | 46 (64.8)            | 15 (45.5)                                    | -                                   | -                                                |            |
|                                                                  |                      |                                              | 50–99<br>n=296                      |                                                  | <i>P</i> * |
|                                                                  | General<br>hospitals | Hospitals<br>with long-<br>term care<br>beds | Special<br>functioning<br>hospitals | Regional<br>medical care<br>support<br>hospitals |            |
| We have taken<br>action in<br>accordance with the<br>Guidelines. | 16 (11.9)            | 20 (13.2)                                    | -                                   | -                                                | 0.707      |
| We have never<br>responded                                       | 64 (47.8)            | 78 (51.3)                                    | -                                   | -                                                |            |

according to the

Guidelines.

|                |           |           |   |   |
|----------------|-----------|-----------|---|---|
| We do not know | 54 (40.3) | 54 (35.5) | - | - |
|----------------|-----------|-----------|---|---|

about the

Guidelines.

100–199

*P*\*

n=455

| General hospitals | Hospitals with long-term care beds | Special functioning hospitals | Regional medical care support hospitals |
|-------------------|------------------------------------|-------------------------------|-----------------------------------------|
|-------------------|------------------------------------|-------------------------------|-----------------------------------------|

|               |           |           |   |   |       |
|---------------|-----------|-----------|---|---|-------|
| We have taken | 47 (29.6) | 47 (16.3) | - | - | 0.004 |
|---------------|-----------|-----------|---|---|-------|

action in

accordance with the

Guidelines.

|               |           |            |   |   |
|---------------|-----------|------------|---|---|
| We have never | 77 (48.4) | 160 (55.6) | - | - |
|---------------|-----------|------------|---|---|

responded

according to the

Guidelines.

|                |           |           |   |   |
|----------------|-----------|-----------|---|---|
| We do not know | 35 (22.0) | 81 (28.1) | - | - |
|----------------|-----------|-----------|---|---|

about the

Guidelines.

200–399

*P*\*

n=244

|                                                         | General hospitals | Hospitals with long-term care beds | Special functioning hospitals | Regional medical care support hospitals |           |
|---------------------------------------------------------|-------------------|------------------------------------|-------------------------------|-----------------------------------------|-----------|
| We have taken action in accordance with the Guidelines. | 29 (29.0)         | 29 (27.9)                          | -                             | 15 (41.7)                               | 0.241     |
| We have never responded according to the Guidelines.    | 47 (47.0)         | 49 (47.1)                          | -                             | 18 (50.0)                               |           |
| We do not know about the Guidelines.                    | 24 (24.0)         | 26 (25.0)                          | -                             | 3 (8.3)                                 |           |
|                                                         |                   |                                    | 400+                          |                                         | <i>P*</i> |
|                                                         |                   |                                    | n=133                         |                                         |           |
|                                                         | General hospitals | Hospitals with long-term care beds | Special functioning hospitals | Regional medical care support hospitals |           |
| We have taken action in accordance with the Guidelines. | 14 (32.5)         | 4 (22.2)                           | 15 (62.5)                     | 16 (34.0)                               | 0.010     |

---

|                                                      |           |          |          |           |
|------------------------------------------------------|-----------|----------|----------|-----------|
| We have never responded according to the Guidelines. | 23 (53.5) | 6 (33.3) | 7 (29.2) | 16 (34.0) |
| We do not know about the Guidelines.                 | 6 (14.0)  | 8 (44.4) | 2 (8.3)  | 15 (32.0) |

---

276 <sup>a</sup> Number of persons (%), excluding missing values, compared between groups by chi-square  
277 test.

278 \*p < .05

279

## 280 Discussion

281 This nationwide survey of hospitals in Japan revealed the actual condition of, and  
282 difficulties associated with, the hospitalization of persons without family, the decision-  
283 making processes for their medical care, and the use of the national Guidelines.  
284 Approximately 70% of the hospitals surveyed allowed the hospitalization of a person without  
285 family each year. As of 2017, there were approximately 70,000 unbefriended individuals in  
286 the U.S., and this group is estimated to grow even larger in the future [33]. Similarly, with the  
287 increase in the number of single households in Japan, hospitalization of those without family  
288 is expected to increase in the future.

289 In cases of the hospitalization of persons without family, collecting emergency  
290 contact information, decision-making related to their medical care, and their discharge  
291 support were cited as difficult situations. Previous research in the U.S. also identified the  
292 following as difficult situations regarding unrepresented older adults: finding a person to act  
293 as their proxy, deciding on their treatment, and finding a suitable discharge location for the



294 patient [19]; similar situations were identified in Japan. As no previous studies have  
295 compared the problems related to persons without family by region or hospital function, this  
296 study provides crucial evidence. Our results demonstrate that the difficulties arising from the  
297 hospitalization of persons without family varies by region and hospital function. In the future,  
298 it is necessary to investigate the factors contributing to this variation and consider support  
299 that can address these factors.

300 Our exploration of the current situation revealed that the decision-making process for  
301 medical care, when the wishes of persons without family cannot be confirmed at the point  
302 when a decision regarding their medical care is required, is often undertaken by the medical  
303 care team or conferences. However, a relatively high percentage of decisions were also made  
304 by the attending physician. As the Guidelines recommend that decisions on medical care for  
305 persons without family are made carefully within the medical care team and are based on the  
306 tenets of the "Guidelines on the Decision-Making Process for Medical Care and Care in the  
307 Final Stage of Life" [34], we believe that the Guideline approach is spreading throughout  
308 Japan. Additionally, for situations in which urgent life-saving measures are required and it is  
309 difficult to allocate time for discussion, medical treatment is based on the judgment of the  
310 physician; thus, it is possible that a high percentage of the decision-making processes for the  
311 medical treatment of persons without family also involved decisions made by an attending  
312 physician. Prior studies have also reported that the medical decision-making process for  
313 persons without family varies depending on the urgency of their medical conditions [1,3,32].  
314 In Japan, the medical decision-making process for persons without family was also found to  
315 be diverse.

316 When the wishes of persons without family could not be confirmed at the point when  
317 a decision regarding their medical care was required, the decision-making process for  
318 medical care was found to vary by hospital type. The special functioning hospitals that had an

319 operational structure in place would tend to use ethics committees. Hospital function  
320 evaluations also require that such hospitals have an in-house committee for clinical ethics and  
321 consider and respond ethically to individual cases [35]. One of the key terms in clinical ethics  
322 consultation cases is "handling patients without family" [36]. To solve the problems related to  
323 the hospitalization of persons without family, the further spread of clinical ethics consultation  
324 activities within hospitals is desirable. However, it is difficult to secure human resources for  
325 such activities; therefore, measures to make clinical ethics consultation a sustainable activity  
326 are recommended [37].

327         The use of the Guidelines was found to be low in local areas and in hospitals with  
328 long-term care beds. Based on the results of our survey, it is possible that local areas and  
329 hospitals with long-term care beds are less likely to use the Guidelines because of the small  
330 number of admissions of persons without family. The number of nearby family members and  
331 neighbors decreases in urban areas [38]; therefore, hospitalization of people without family  
332 may be less common in local areas than it is in urban areas, because of the support provided  
333 by the local population. The American Geriatrics Society recommends that a nationally  
334 uniform approach to unbefriended patients be considered for the provision of equitable health  
335 care [39]. In Japan, it is hoped that the Guidelines will be further disseminated to ensure  
336 fairness in medical care. Future research should identify medical needs for persons without  
337 family.

338         While we sent reminder letters in an attempt to receive responses from slow or non-  
339 responders, one limitation of this study is its low response rate (30.1%), which may be due to  
340 a selection bias in which only hospitals that are actively engaged in the hospitalization of  
341 persons without family responded to the survey. Therefore, it is possible that there is an  
342 overestimation of the percentage of hospitals that are aware of the Guidelines and the nature  
343 of their efforts to hospitalize persons without family. In addition, the survey may not

344 represent actual family relationships because the respondents were not the patients  
345 themselves. Future research should clarify the medical needs of persons without family and  
346 the criteria for the medical decision-making process, and establish a system that can provide  
347 the best medical care for such patients.

348

## 349 **Conclusion**

350         Of the 4,000 hospitals included in this study, approximately 70% allowed the  
351 admission of persons without family. The difficulties arising from the hospitalization of  
352 persons without family included gathering emergency contact information, decision-making  
353 related to medical care, and discharge support. When the wishes of persons without family  
354 could not be confirmed at the point when a decision regarding their medical care was  
355 required, the most common process was for the medical care team to make decisions. Most of  
356 the hospitals had never used the government-recommended Guidelines. Furthermore,  
357 difficulties arising in the hospitalization of persons without family and the use of the  
358 Guidelines differed significantly by region and hospital type. Significant differences were  
359 found in the decision-making processes for medical care when the wishes of persons without  
360 family could not be confirmed at the point when a decision regarding their medical care was  
361 required by hospital type. Based on our results, it is recommended that awareness regarding  
362 the Guidelines and clinical ethics consultation activities should be spread within hospitals to  
363 address the difficulties encountered during hospitalization of persons without family.  
364 Moreover, effective interventions should be undertaken to secure human resources for such  
365 activities and make them mainstream in medical care for persons without family.

366         This study's strength is its nationwide examination of the actual conditions and  
367 difficulties related to the hospitalization of persons without family in Japan, the medical  
368 decision-making process, and the use of the Guidelines. In addition, comparisons were made

369 by region and hospital function in Japan. Since no previous studies have focused on the  
370 nationwide hospitalization of persons without family in Japan, it is hoped that the results of  
371 this study will help create a system in which everyone can receive appropriate medical care,  
372 regardless of the presence of family.

373

## 374 **Acknowledgments**

375 This study was supported by Health Science and Labor Research Grants, Japan  
376 (Project Number 201A1013) and JSPS KAKENHI Grand number 21K02056.

377

## 378 **References**

- 379 1. Pope TM. Legal Briefing: Adult orphans and the unbefriended: Making medical  
380 decisions for unrepresented patients without surrogates. *J Clin Ethics*. 2015;  
381 26(2):180-8.
- 382 2. Carney MT, Fujiwara J, Emmert Jr. BE, Liberman TA, Paris B. Elder orphans hiding  
383 in plain sight: A growing vulnerable population. *Current Gerontology and Geriatrics*  
384 *Research*. 2016. doi: 10.1155/2016/4723250.
- 385 3. Rope TM, Sellrer T. Legal Briefing: The unbefriended: Making healthcare decisions  
386 for patients without surrogates (Part 1). *J Clin Ethics*. 2012; 23(1):84-96.
- 387 4. Montayre J, Montayre J, Thaggard S. The elder orphan in healthcare settings: An  
388 integrative review. *J Popul Ageing*. 2019; 12:515-532. doi: 10.1007/s12062-018-  
389 9222-x.
- 390 5. Goodlett McDaniel J, Clark PG. The new adult orphan: Issues and considerations for  
391 health care professionals. *J Gerontol Nurs*. 2009; 35(12):44-9. doi:  
392 10.3928/00989134-20090930-02.

- 393 6. Kim H, Song M-K. Medical decision-making for adults who lack decision-making  
394 capacity and a surrogate: State of the Science. *American Journal of Hospice and*  
395 *Palliative Medicine*. 2018; 35(9):1227-1234. doi: 10.1177/1049909118755647.
- 396 7. Sequeira ALS, Lewis A. Ethical and legal considerations in the management of an  
397 unbefriended patient in a vegetative state. *Neurocrit Care*. 2017; 27(2):173-179. doi:  
398 10.1007/s12028-017-0405-8.
- 399 8. Moyer J, Catlin C, Kwak J, Wood E, Teaster PB. Ethical concerns and procedural  
400 pathways for patients who are incapacitated and alone: Implications from a qualitative  
401 study for advancing ethical practice. *HEC Forum*. 2017; 29(2):171-189. doi:  
402 10.1007/s10730-016-9317-9.
- 403 9. Verma A, Smith AK, Harrison KL, Chodos AH. Ethical challenges in caring for  
404 unrepresented adults: A qualitative study of key stakeholders. *J Am Geriatr Soc*.  
405 2019; 67(8):1724-1729. doi: 10.1111/jgs.15957.
- 406 10. Kervin LM, Teo K, Churchill R, Riadi I, Cosco TD. Barriers in health and social care  
407 access and navigation for elder orphans: A scoping review protocol. *BMJ Open*. 2021;  
408 11(5):e043876. doi: 10.1136/bmjopen-2020-043876.
- 409 11. Gittler J. Advance care planning and surrogate health care decision making for older  
410 adults. *J Gerontol Nurs*. 2011; 37(5):15–9. doi: 10.3928/00989134-20100401-01.
- 411 12. Weiss BD, Berman EA, Howe CL, Fleming RB. Medical decision-making for older  
412 adults without family. *J Am Geriatr Soc*. 2012; 60(11):2144-2150. doi:  
413 10.1111/j.1532-5415.2012.04212.x.
- 414 13. Farrell TW, Widera E, Rosenberg L, Rubin CD, Naik AD, Braun U, et al. AGS  
415 position statement: Making medical treatment decisions for unbefriended older adults.  
416 *J Am Geriatr Soc*. 2017; 65(1):14-15. doi: 10.1111/jgs.14586.

- 417 14. Sager Z, Catlin C, Connors H, Farrell T, Teaster P, Moye J. Making end-of-life care  
418 decisions for older adults subject to guardianship *Elder Law J.* 2019; 27(1): 1-34.
- 419 15. Effiong A, Harman S. Patients who lack capacity and lack surrogates: Can they enroll  
420 in hospice? *J Pain Symptom Manage.* 2019; 48(4):745-50.e1.  
421 doi:10.1016/j.jpainsymman.2013.12.244.
- 422 16. Pope TM. Five things clinicians should know when caring for unrepresented patients.  
423 *AMA J Ethics.* 2019; 21(7):E582-586. doi: 10.1001/amajethics.2019.582.
- 424 17. Midboe AM, Gray C, Cheng H, Okwara L, Gale RC. Implementation of health-  
425 focused interventions in vulnerable populations: Protocol for a scoping review. *BMJ*  
426 *Open.* 2020; 10(7):e036937. doi: 10.1136/bmjopen-2020-036937.
- 427 18. Chamberlain SA, Duggleby W, Teaster P, Estabrooks C. Characteristics and unmet  
428 care needs of unbefriended residents in long-term care: A qualitative interview study.  
429 *Aging Ment Health.* 2019; 24(4):659-667. doi: 10.1080/13607863.2019.1566812.
- 430 19. Dassel KB, Edelman LS, Moye J, Catlin C, Farrell TW. "I worry about this patient  
431 EVERY day": Geriatrics Clinicians' Challenges in Caring for Unrepresented Older  
432 Adults. *J Appl Gerontol.* 2022; 41(4):1167-1174. doi: 10.1177/07334648211041261.
- 433 20. Chamberlain S, Baik S, Estabrooks C. Going it alone: A scoping review of  
434 unbefriended older adults. *Can J Aging.* 2018; 37(1):1-11. doi:  
435 10.1017/S0714980817000563.
- 436 21. Farrell TW, Catlin C, Chodos AH, Naik AD, Widera E, Moye J. Caring for  
437 unbefriended older adults and adult orphans: A clinician survey. *Clin Gerontol.* 2021;  
438 44(4):494-503. doi: 10.1080/07317115.2019.1640332.
- 439 22. White DB, Curtis JR, Wolf LE, Prendergast TJ, Taichman DB, Kuniyoshi G, et al.  
440 Life support for patients without a surrogate decision maker: Who decides? *Ann*  
441 *Intern Med.* 2007;147(1):34-40. doi: 10.7326/0003-4819-147-1-200707030-00006.

- 442 23. Karp N, Wood E. Incapacitated and alone: Healthcare decision making for  
443 unbefriended older people. American Bar Association. 2013.  
444 [https://www.americanbar.org/content/dam/aba/administrative/law\\_aging/2003\\_Unbef](https://www.americanbar.org/content/dam/aba/administrative/law_aging/2003_Unbefriended_Elderly_Health_Care_Descision-Making7-11-03.authcheckdam.pdf)  
445 [riended\\_Elderly\\_Health\\_Care\\_Descision-Making7-11-03.authcheckdam.pdf](https://www.americanbar.org/content/dam/aba/administrative/law_aging/2003_Unbefriended_Elderly_Health_Care_Descision-Making7-11-03.authcheckdam.pdf)  
446 (accessed July 12, 2022).
- 447 24. Cohen AB, Costello DM, O'Leary JR, Fried TR. Older adults without desired  
448 surrogates in a nationally representative sample. *J Am Geriatr Soc*. 2021;  
449 69(1):114-121. doi: 10.1111/jgs.16813.
- 450 25. Catlin CC, Connors HL, Teaster PB, Wood E, Sager ZS, Moye J. Unrepresented  
451 adults face adverse healthcare consequences: The role of guardians, public  
452 guardianship reform, and alternative policy solutions. *J Aging Soc Policy*. 2021;  
453 34(3):418-437. doi: 10.1080/08959420.2020.1851433.
- 454 26. Courtwright A, Rubin E. Who should decide for the unrepresented? *Bioethics*. 2016;  
455 30(3):173-80. doi: 10.1111/bioe.12185.
- 456 27. Ministry of Health, Labor and Welfare. FY2009 Health, Labor and Welfare Science  
457 Research Grants (Health, Labor and Welfare Science Special Research Project),  
458 "Study on Understanding of the Adult Guardianship System in the Medical Field and  
459 Roles Hospitals Require of Guarantors (Principal Investigator: Zentarō Yamagata),"  
460 Summary and Partial Report. <https://www.mhlw.go.jp/content/000734017.pdf>  
461 (accessed September 1, 2021).
- 462 28. Adult Guardianship Center and Legal Support. Report on the Results of the Survey on  
463 Personal Guarantees, etc. in Hospitals, Institutions, etc. [https://www.legal-](https://www.legal-support.or.jp/akamon_regal_support/static/page/main/newsttopics/mimotohoshohoukouku.pdf)  
464 [support.or.jp/akamon\\_regal\\_support/static/page/main/newsttopics/mimotohoshohoukou](https://www.legal-support.or.jp/akamon_regal_support/static/page/main/newsttopics/mimotohoshohoukouku.pdf)  
465 [ku.pdf](https://www.legal-support.or.jp/akamon_regal_support/static/page/main/newsttopics/mimotohoshohoukouku.pdf) (accessed September 15, 2021).

- 466 29. Research Group for Understanding of the Adult Guardianship System in the Medical  
467 Field and the Role of Guarantors Required by Hospitals and the Role that Hospitals  
468 Expect Guarantors to Play (Principal Investigator: Zentarō Yamagata). Guidelines for  
469 hospitalization of persons without family and support for persons with decision-  
470 making difficulties regarding medical care.  
471 <https://www.mhlw.go.jp/content/000516181.pdf> (accessed September 15, 2021).
- 472 30. Ministry of Health, Labor and Welfare. Report on the function of hospital beds in  
473 fiscal year 2009.  
474 [https://www.mhlw.go.jp/stf/seisakunitsuite/bunya/open\\_data\\_00002.html](https://www.mhlw.go.jp/stf/seisakunitsuite/bunya/open_data_00002.html) (accessed  
475 September 15, 2021).
- 476 31. Ministry of Land, Infrastructure, Transport and Tourism. Definition of terms such as  
477 use and area. <https://www.mlit.go.jp/totikensangyo/H30kouji05.html> (accessed  
478 September 15, 2021).
- 479 32. Ministry of Land, Infrastructure, Transport and Tourism. Metropolitan Area  
480 Development Law.  
481 [https://www.mlit.go.jp/toshi/daisei/kokudokeikaku\\_tk5\\_000012.html](https://www.mlit.go.jp/toshi/daisei/kokudokeikaku_tk5_000012.html) (accessed  
482 September 15, 2021).
- 483 33. Pope TM. Unbefriended and unrepresented: Better medical decision making for  
484 incapacitated patients without healthcare surrogates. *Ga State Univ Law Rev.* 2017;  
485 33(4):923-1016.
- 486 34. Ministry of Health, Labor and Welfare. Guidelines for the Decision-Making Process  
487 of Medical Treatment and Care in the Final Stage of Life.  
488 [https://www.mhlw.go.jp/file/04-Houdouhappyou-10802000-Iseikyoku-  
489 Shidouka/0000197701.pdf](https://www.mhlw.go.jp/file/04-Houdouhappyou-10802000-Iseikyoku-Shidouka/0000197701.pdf) (accessed September 15, 2021).



- 490 35. Takimoto Y. The first fundamentals of clinical ethics: What are clinical ethics and  
491 ethical issues. Japanese Society of Psychosomatic Medicine. 2014; 54(2):174-176.  
492 doi: 10.15064/jjpm.54.2\_174.
- 493 36. Miura Y, Itai K, Ayabe T. Classification of contents in clinical ethics consultation  
494 requests: Based on clinical indicators of the University of Miyazaki Hospital. Journal  
495 of the Japan Association for Bioethics. 2020; 30(1):40-78. doi:  
496 10.20593/jabedit.30.1\_40.
- 497 37. Kaneda H. Toward sustainable clinical ethics consultation. Journal of the Japan  
498 Association for Bioethics. 2020; 30(1):67-77. doi: 10.20593/jabedit.30.1\_67.
- 499 38. Harada K, Sugisawa H. Urbanism and personal networks: Multilevel analyses of kin,  
500 neighbours, and friends. Japanese Sociological Review. 2014; 65(1):80-96. doi:  
501 10.4057/jsr.65.80.
- 502 39. Farrell TW, Widera E, Rosenberg L, Rubin CD, Naik AD, Braun U, et al. AGS  
503 position statement: Making medical treatment decisions for unbefriended older adults.  
504 Journal of the American Geriatrics Society. 2017; 65(1):14-15. doi:  
505 10.1111/jgs.14586.

506  
507

## 508 **Supporting Information Captions**

### 509 **S1 Questionnaire**

510

### 511 **S2 Table.** Region and hospital type

512

### 513 **S3 Table.** Hospital type and number of beds

514

515 **S4 Table.** Number of beds and region
